# Supplementary material for: Ba15Zr14Te42: a new complex ternary telluride structure with low thermal conductivity
Source: Royal Society of Chemistry journal article supplement (doi:10.1039/d4dt01878h), 2024-01-01
Supplement: d4dt01878h1.pdf [file d4dt01878h1.pdf]

## Ba<sub>15</sub>Zr<sub>14</sub>Te<sub>42</sub>: a new complex ternary telluride structure with low thermal conductivity

Sweta Yadav,<sup>a</sup> Manish K. Niranjana,<sup>b</sup> and Jai Prakash<sup>a,\*</sup>

<sup>a</sup>Department of Chemistry, Indian Institute of Technology Hyderabad, Kandi, Sangareddy, Telangana 502284, India

<sup>b</sup>Department of Physics, Indian Institute of Technology Hyderabad, Kandi, Sangareddy, Telangana 502284, India

\*Corresponding author, E-mail address: [jaiprakash@chy.iith.ac.in](mailto:jaiprakash@chy.iith.ac.in) (Jai Prakash)

### Electronic Supplementary Information (ESI)

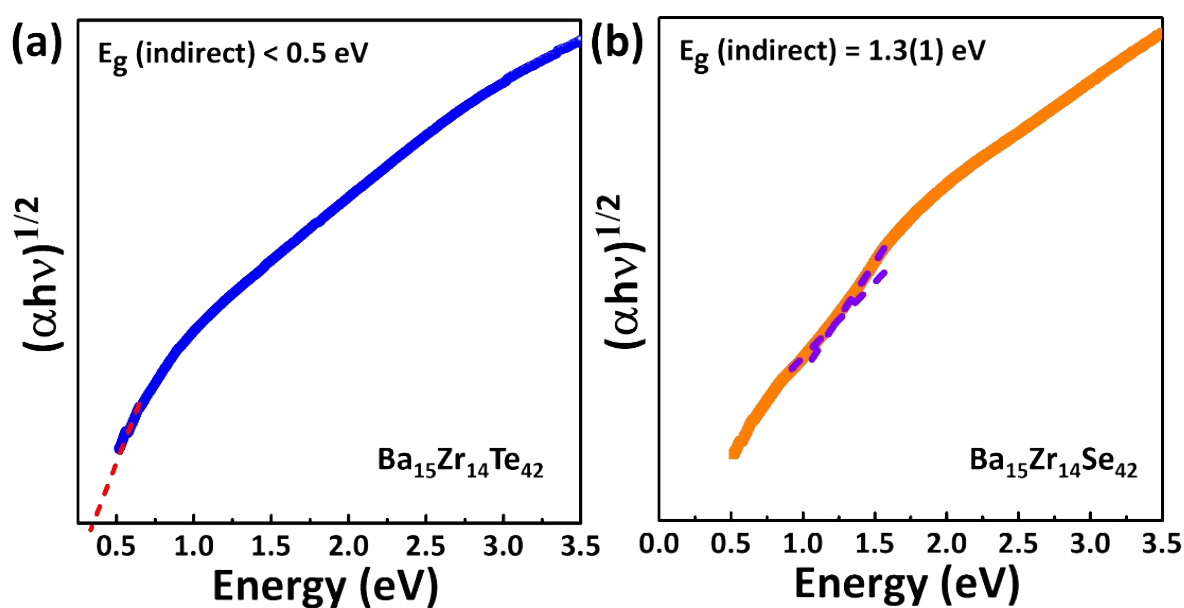

**Fig. S11.** The indirect bandgap Tauc plots for the polycrystalline (a) Ba<sub>15</sub>Zr<sub>14</sub>Te<sub>42</sub> and (b) Ba<sub>15</sub>Zr<sub>14</sub>Se<sub>42</sub> samples.

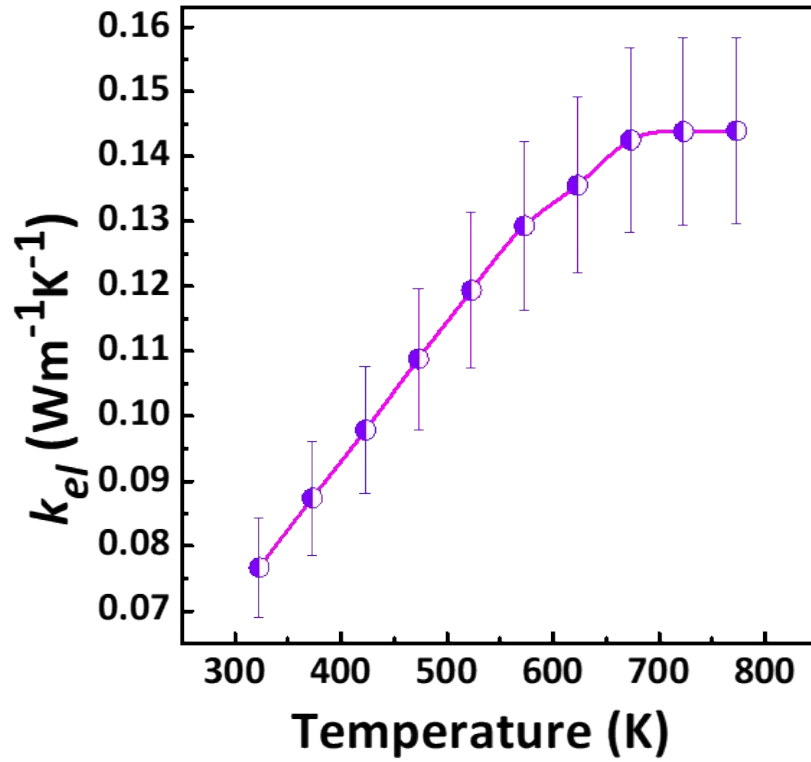

Fig. SI2. The temperature-dependent electrical thermal conductivity for the polycrystalline  $\text{Ba}_{15}\text{Zr}_{14}\text{Te}_{42}$  sample.

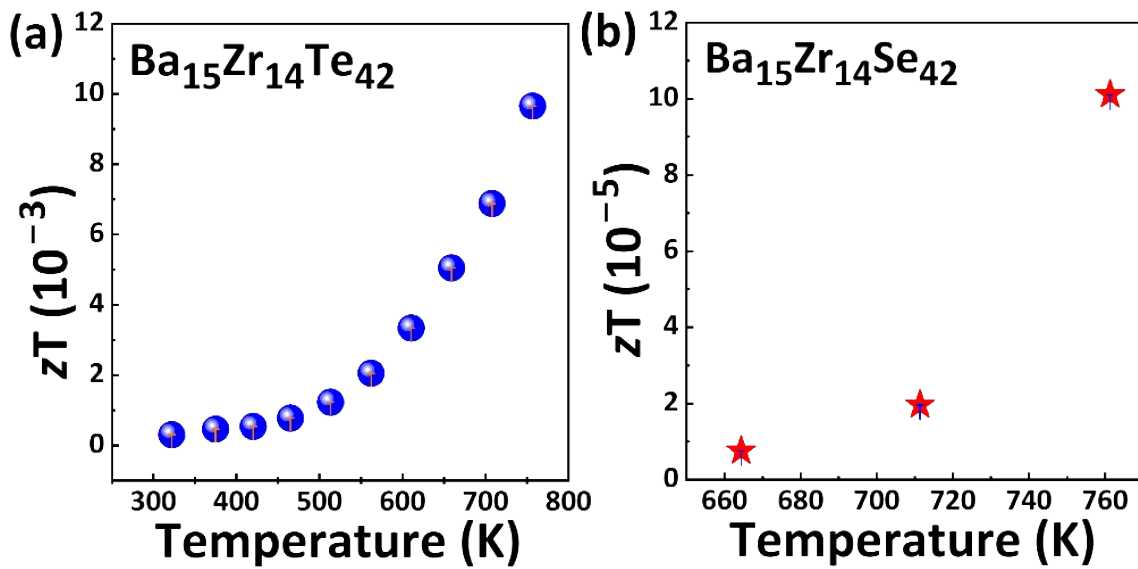

Fig. SI3. The temperature-dependent  $zT$  plots for the polycrystalline  $\text{Ba}_{15}\text{Zr}_{14}\text{Q}_{42}$  samples.

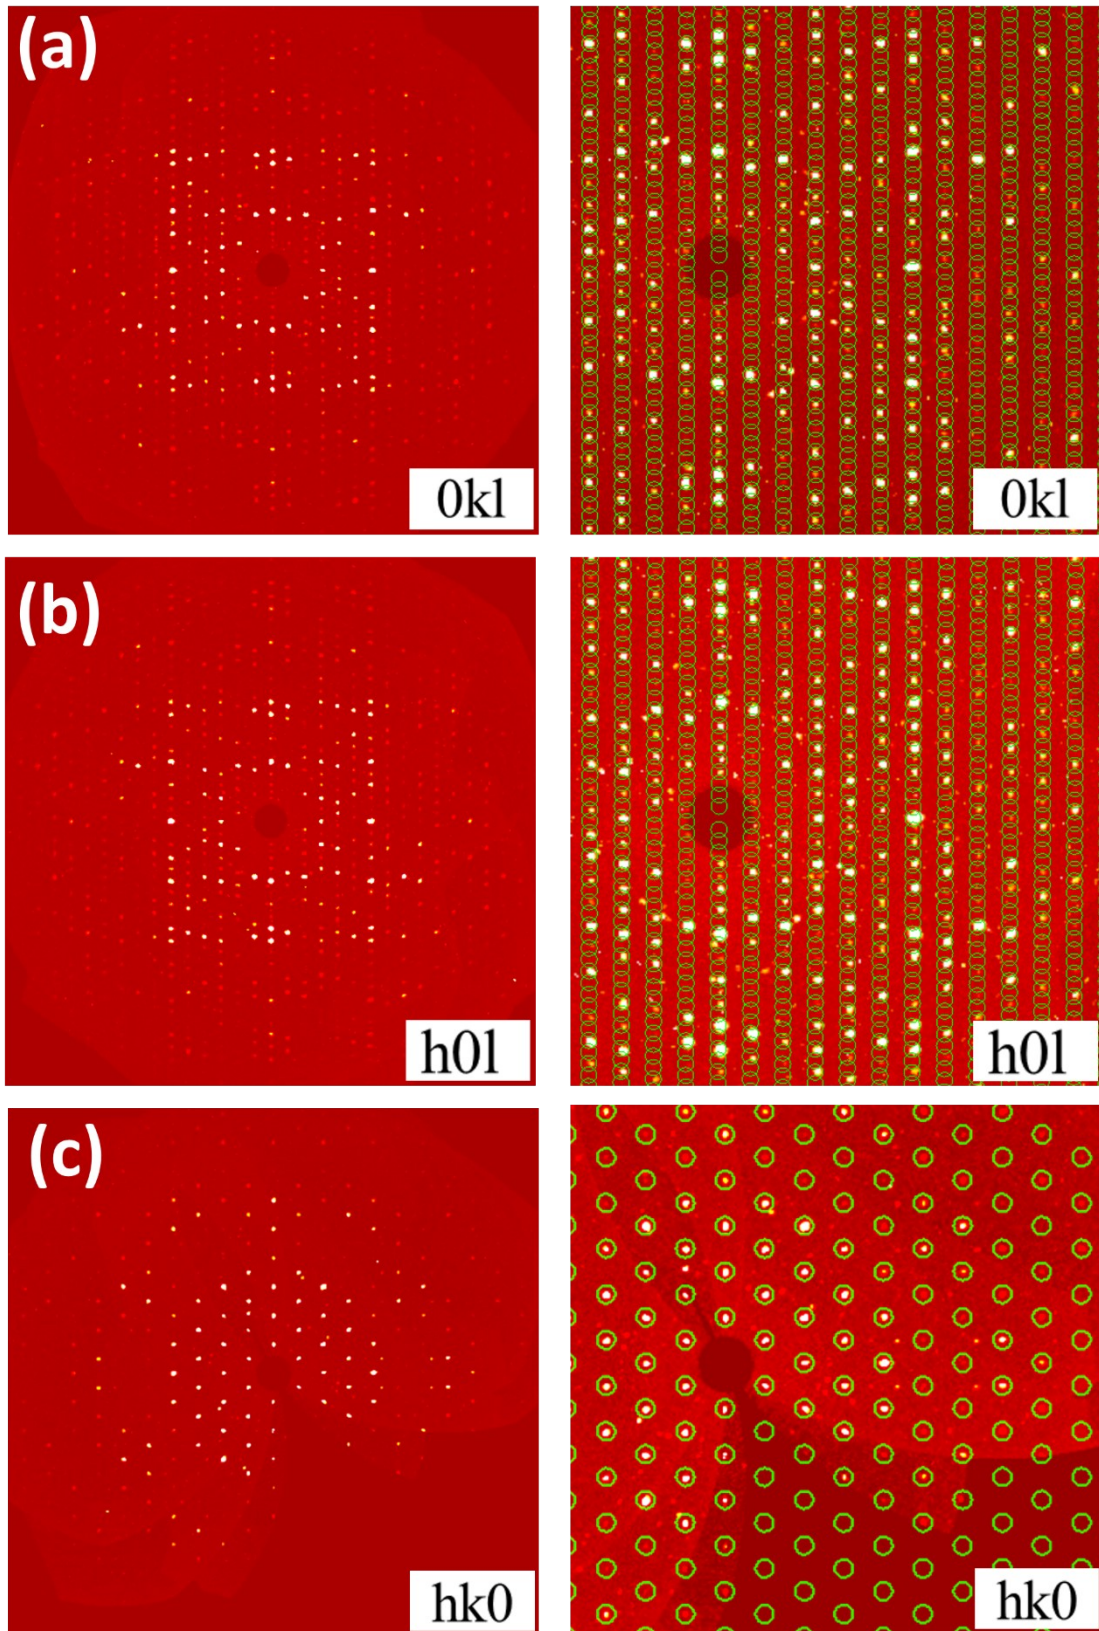

**Fig. SI4.** The synthesized precession images for the  $\text{Ba}_{15}\text{Zr}_{14}\text{Te}_{42}$  crystal calculated using the SCXRD dataset.

**Table S11:** Atomic displacement parameters ( $\text{\AA}^2$ ) for the  $\text{Ba}_{15}\text{Zr}_{14}\text{Te}_{42}$ .

|     | $U^{11}$   | $U^{22}$   | $U^{33}$   | $U^{12}$   | $U^{13}$   | $U^{23}$   |
|-----|------------|------------|------------|------------|------------|------------|
| Ba1 | 0.0253(6)  | 0.0407(7)  | 0.0262(6)  | 0.0195(5)  | 0.0132(5)  | 0.0172(5)  |
| Ba2 | 0.0157(5)  | 0.0154(5)  | 0.0240(5)  | 0.0065(4)  | 0.0001(4)  | 0.0070(4)  |
| Ba3 | 0.0256(6)  | 0.0256(6)  | 0.0478(10) | 0.0102(7)  | -0.0084(4) | 0.0084(4)  |
| Zr1 | 0.0147(8)  | 0.0147(8)  | 0.0135(12) | 0.0073(4)  | 0.000      | 0.000      |
| Zr2 | 0.0140(8)  | 0.0140(8)  | 0.0092(11) | 0.0070(4)  | 0.000      | 0.000      |
| Zr3 | 0.0156(8)  | 0.0156(8)  | 0.0112(12) | 0.0078(4)  | 0.000      | 0.000      |
| Zr4 | 0.0150(8)  | 0.0150(8)  | 0.0132(12) | 0.0075(4)  | 0.000      | 0.000      |
| Zr5 | 0.0150(8)  | 0.0150(8)  | 0.0122(12) | 0.0075(4)  | 0.000      | 0.000      |
| Zr6 | 0.0129(8)  | 0.0129(8)  | 0.0114(12) | 0.0065(4)  | 0.000      | 0.000      |
| Zr7 | 0.0157(12) | 0.0157(12) | 0.0180(18) | 0.0079(6)  | 0.000      | 0.000      |
| Zr8 | 0.0138(11) | 0.0138(11) | 0.0201(19) | 0.0069(6)  | 0.000      | 0.000      |
| Te1 | 0.0259(6)  | 0.0144(5)  | 0.0134(5)  | 0.0134(5)  | 0.0045(4)  | 0.0021(4)  |
| Te2 | 0.0182(6)  | 0.0192(6)  | 0.0163(5)  | -0.0010(5) | -0.0003(4) | 0.0041(4)  |
| Te3 | 0.0241(6)  | 0.0117(5)  | 0.0102(5)  | 0.0109(4)  | 0.0006(4)  | 0.0015(4)  |
| Te4 | 0.0112(5)  | 0.0170(5)  | 0.0124(4)  | 0.0079(4)  | -0.0016(4) | -0.0010(4) |
| Te5 | 0.0614(9)  | 0.0119(5)  | 0.0169(5)  | 0.0170(6)  | -0.0159(6) | -0.0026(4) |
| Te6 | 0.0122(5)  | 0.0152(5)  | 0.0105(4)  | 0.0081(4)  | 0.0007(4)  | 0.0003(4)  |
| Te7 | 0.0123(6)  | 0.1037(15) | 0.0335(7)  | 0.0154(8)  | -0.0035(5) | -0.0418(9) |

**Table S12:** Geometric parameters ( $\text{\AA}$ ,  $^\circ$ ) for the  $\text{Ba}_{15}\text{Zr}_{14}\text{Te}_{42}$ .

|                         |            |                          |            |
|-------------------------|------------|--------------------------|------------|
| Ba1–Te5 <sup>i</sup>    | 3.4903(16) | Zr3–Te3 <sup>xviii</sup> | 2.8861(19) |
| Ba1–Te4 <sup>ii</sup>   | 3.5793(15) | Zr3–Te3 <sup>xix</sup>   | 2.8861(18) |
| Ba1–Te1 <sup>iii</sup>  | 3.6444(18) | Zr3–Te3                  | 2.8862(18) |
| Ba1–Te6 <sup>iii</sup>  | 3.6452(15) | Zr3–Te4                  | 2.9125(19) |
| Ba1–Te2 <sup>iv</sup>   | 3.647(2)   | Zr3–Te4 <sup>xix</sup>   | 2.9126(19) |
| Ba1–Te5 <sup>v</sup>    | 3.654(2)   | Zr3–Te4 <sup>xviii</sup> | 2.9126(19) |
| Ba1–Te1 <sup>vi</sup>   | 3.8050(17) | Zr3–Zr4                  | 3.528(4)   |
| Ba1–Te2 <sup>i</sup>    | 3.8791(19) | Zr4–Te5                  | 2.843(2)   |
| Ba1–Te1 <sup>vii</sup>  | 3.8843(16) | Zr4–Te5 <sup>xviii</sup> | 2.843(2)   |
| Ba2–Te2 <sup>viii</sup> | 3.4748(15) | Zr4–Te5 <sup>xix</sup>   | 2.843(2)   |
| Ba2–Te7 <sup>ix</sup>   | 3.499(2)   | Zr4–Te4 <sup>xix</sup>   | 2.9452(19) |

|                                           |            |                               |            |
|-------------------------------------------|------------|-------------------------------|------------|
| Ba2–Te4 <sup>x</sup>                      | 3.5605(15) | Zr4–Te4 <sup>xviii</sup>      | 2.9452(19) |
| Ba2–Te3 <sup>x</sup>                      | 3.5841(14) | Zr4–Te4                       | 2.9453(19) |
| Ba2–Te6 <sup>xi</sup>                     | 3.6051(15) | Zr4–Zr5                       | 3.461(4)   |
| Ba2–Te1 <sup>xii</sup>                    | 3.6161(15) | Zr5–Te2                       | 2.862(2)   |
| Ba2–Te4 <sup>xiii</sup>                   | 3.6784(15) | Zr5–Te2 <sup>xviii</sup>      | 2.862(2)   |
| Ba2–Te6 <sup>xii</sup>                    | 3.6927(15) | Zr5–Te2 <sup>xix</sup>        | 2.862(2)   |
| Ba2–Te3 <sup>xii</sup>                    | 3.9418(15) | Zr5–Te5 <sup>xviii</sup>      | 2.908(2)   |
| Ba3–Te7 <sup>xiv</sup>                    | 3.488(2)   | Zr5–Te5 <sup>xix</sup>        | 2.908(2)   |
| Ba3–Te7 <sup>xv</sup>                     | 3.488(2)   | Zr5–Te5                       | 2.908(2)   |
| Ba3–Te6                                   | 3.6863(11) | Zr5–Zr6                       | 3.616(4)   |
| Ba3–Te6 <sup>xvi</sup>                    | 3.6866(10) | Zr6–Te7                       | 2.859(2)   |
| Ba3–Te3 <sup>xvi</sup>                    | 3.710(2)   | Zr6–Te7 <sup>xviii</sup>      | 2.859(2)   |
| Ba3–Te3                                   | 3.710(2)   | Zr6–Te7 <sup>xix</sup>        | 2.859(2)   |
| Ba3–Te3 <sup>xvii</sup>                   | 3.7648(12) | Zr6–Te2 <sup>xviii</sup>      | 2.937(2)   |
| Ba3–Te3 <sup>xviii</sup>                  | 3.7649(12) | Zr6–Te2 <sup>xix</sup>        | 2.937(2)   |
| Zr1–Te1 <sup>xviii</sup>                  | 2.8913(18) | Zr6–Te2                       | 2.937(2)   |
| Zr1–Te1 <sup>xix</sup>                    | 2.8913(18) | Zr6–Zr8                       | 3.557(3)   |
| Zr1–Te1                                   | 2.8915(18) | Zr7–Te1 <sup>xx</sup>         | 2.9037(11) |
| Zr1–Te6 <sup>xix</sup>                    | 2.9538(18) | Zr7–Te1 <sup>xxi</sup>        | 2.9037(11) |
| Zr1–Te6 <sup>xviii</sup>                  | 2.9538(18) | Zr7–Te1 <sup>xxii</sup>       | 2.9038(11) |
| Zr1–Te6                                   | 2.9539(18) | Zr7–Te1                       | 2.9038(11) |
| Zr1–Zr7                                   | 3.205(3)   | Zr7–Te1 <sup>xviii</sup>      | 2.9040(11) |
| Zr1–Zr2                                   | 3.309(4)   | Zr7–Te1 <sup>xix</sup>        | 2.9040(11) |
| Zr2–Te3                                   | 2.8963(18) | Zr8–Te7 <sup>xxiii</sup>      | 2.8806(14) |
| Zr2–Te3 <sup>xviii</sup>                  | 2.8964(18) | Zr8–Te7 <sup>xxiv</sup>       | 2.8806(14) |
| Zr2–Te3 <sup>xix</sup>                    | 2.8964(18) | Zr8–Te7 <sup>xxv</sup>        | 2.8806(14) |
| Zr2–Te6                                   | 2.8975(17) | Zr8–Te7 <sup>xviii</sup>      | 2.8807(14) |
| Zr2–Te6 <sup>xix</sup>                    | 2.8976(18) | Zr8–Te7 <sup>xix</sup>        | 2.8808(14) |
| Zr2–Te6 <sup>xviii</sup>                  | 2.8976(17) | Zr8–Te7                       | 2.8809(14) |
| Zr2–Zr3                                   | 3.372(4)   |                               |            |
|                                           |            |                               |            |
| Te5 <sup>i</sup> –Ba1–Te4 <sup>ii</sup>   | 126.49(5)  | Te5 <sup>xix</sup> –Zr4–Zr5   | 53.85(5)   |
| Te5 <sup>i</sup> –Ba1–Te1 <sup>iii</sup>  | 125.80(5)  | Te4 <sup>xix</sup> –Zr4–Zr5   | 127.46(5)  |
| Te4 <sup>ii</sup> –Ba1–Te1 <sup>iii</sup> | 89.26(4)   | Te4 <sup>xviii</sup> –Zr4–Zr5 | 127.46(5)  |
| Te5 <sup>i</sup> –Ba1–Te6 <sup>iii</sup>  | 157.42(5)  | Te4–Zr4–Zr5                   | 127.46(5)  |

|                                            |           |                                                |           |
|--------------------------------------------|-----------|------------------------------------------------|-----------|
| Te4 <sup>ii</sup> –Ba1–Te6 <sup>iii</sup>  | 64.87(3)  | Te5–Zr4–Zr3                                    | 126.15(5) |
| Te1 <sup>iii</sup> –Ba1–Te6 <sup>iii</sup> | 68.91(3)  | Te5 <sup>xviii</sup> –Zr4–Zr3                  | 126.15(5) |
| Te5 <sup>i</sup> –Ba1–Te2 <sup>iv</sup>    | 77.96(4)  | Te5 <sup>xix</sup> –Zr4–Zr3                    | 126.15(5) |
| Te4 <sup>ii</sup> –Ba1–Te2 <sup>iv</sup>   | 112.20(4) | Te4 <sup>xix</sup> –Zr4–Zr3                    | 52.54(5)  |
| Te1 <sup>iii</sup> –Ba1–Te2 <sup>iv</sup>  | 129.40(4) | Te4 <sup>xviii</sup> –Zr4–Zr3                  | 52.54(5)  |
| Te6 <sup>iii</sup> –Ba1–Te2 <sup>iv</sup>  | 79.54(4)  | Te4–Zr4–Zr3                                    | 52.54(5)  |
| Te5 <sup>i</sup> –Ba1–Te5 <sup>v</sup>     | 67.16(4)  | Zr5–Zr4–Zr3                                    | 180.0     |
| Te4 <sup>ii</sup> –Ba1–Te5 <sup>v</sup>    | 63.87(3)  | Te2–Zr5–Te2 <sup>xviii</sup>                   | 86.60(7)  |
| Te1 <sup>iii</sup> –Ba1–Te5 <sup>v</sup>   | 107.63(4) | Te2–Zr5–Te2 <sup>xix</sup>                     | 86.60(7)  |
| Te6 <sup>iii</sup> –Ba1–Te5 <sup>v</sup>   | 128.66(4) | Te2 <sup>xviii</sup> –Zr5–Te2 <sup>xix</sup>   | 86.59(7)  |
| Te2 <sup>iv</sup> –Ba1–Te5 <sup>v</sup>    | 122.96(4) | Te2–Zr5–Te5 <sup>xviii</sup>                   | 168.22(4) |
| Te5 <sup>i</sup> –Ba1–Te1 <sup>vi</sup>    | 101.81(4) | Te2 <sup>xviii</sup> –Zr5–Te5 <sup>xviii</sup> | 86.18(4)  |
| Te4 <sup>ii</sup> –Ba1–Te1 <sup>vi</sup>   | 130.29(4) | Te2 <sup>xix</sup> –Zr5–Te5 <sup>xviii</sup>   | 102.23(4) |
| Te1 <sup>iii</sup> –Ba1–Te1 <sup>vi</sup>  | 68.25(4)  | Te2–Zr5–Te5 <sup>xix</sup>                     | 102.23(4) |
| Te6 <sup>iii</sup> –Ba1–Te1 <sup>vi</sup>  | 65.73(3)  | Te2 <sup>xviii</sup> –Zr5–Te5 <sup>xix</sup>   | 168.22(5) |
| Te2 <sup>iv</sup> –Ba1–Te1 <sup>vi</sup>   | 62.94(3)  | Te2 <sup>xix</sup> –Zr5–Te5 <sup>xix</sup>     | 86.17(4)  |
| Te5 <sup>v</sup> –Ba1–Te1 <sup>vi</sup>    | 163.71(5) | Te5 <sup>xviii</sup> –Zr5–Te5 <sup>xix</sup>   | 86.29(7)  |
| Te5 <sup>i</sup> –Ba1–Te2 <sup>i</sup>     | 64.41(4)  | Te2–Zr5–Te5                                    | 86.18(4)  |
| Te4 <sup>ii</sup> –Ba1–Te2 <sup>i</sup>    | 74.36(3)  | Te2 <sup>xviii</sup> –Zr5–Te5                  | 102.24(4) |
| Te1 <sup>iii</sup> –Ba1–Te2 <sup>i</sup>   | 163.14(4) | Te2 <sup>xix</sup> –Zr5–Te5                    | 168.22(4) |
| Te6 <sup>iii</sup> –Ba1–Te2 <sup>i</sup>   | 106.38(4) | Te5 <sup>xviii</sup> –Zr5–Te5                  | 86.29(7)  |
| Te2 <sup>iv</sup> –Ba1–Te2 <sup>i</sup>    | 62.78(4)  | Te5 <sup>xix</sup> –Zr5–Te5                    | 86.29(7)  |
| Te5 <sup>v</sup> –Ba1–Te2 <sup>i</sup>     | 61.83(3)  | Te2–Zr5–Zr4                                    | 127.64(5) |
| Te1 <sup>vi</sup> –Ba1–Te2 <sup>i</sup>    | 125.66(4) | Te2 <sup>xviii</sup> –Zr5–Zr4                  | 127.64(5) |
| Te5 <sup>i</sup> –Ba1–Te1 <sup>vii</sup>   | 63.85(4)  | Te2 <sup>xix</sup> –Zr5–Zr4                    | 127.64(5) |
| Te4 <sup>ii</sup> –Ba1–Te1 <sup>vii</sup>  | 144.96(5) | Te5 <sup>xviii</sup> –Zr5–Zr4                  | 52.15(5)  |
| Te1 <sup>iii</sup> –Ba1–Te1 <sup>vii</sup> | 64.65(4)  | Te5 <sup>xix</sup> –Zr5–Zr4                    | 52.15(5)  |
| Te6 <sup>iii</sup> –Ba1–Te1 <sup>vii</sup> | 120.05(4) | Te5–Zr5–Zr4                                    | 52.15(5)  |
| Te2 <sup>iv</sup> –Ba1–Te1 <sup>vii</sup>  | 102.61(4) | Te2–Zr5–Zr6                                    | 52.36(5)  |
| Te5 <sup>v</sup> –Ba1–Te1 <sup>vii</sup>   | 100.59(4) | Te2 <sup>xviii</sup> –Zr5–Zr6                  | 52.36(5)  |
| Te1 <sup>vi</sup> –Ba1–Te1 <sup>vii</sup>  | 63.22(3)  | Te2 <sup>xix</sup> –Zr5–Zr6                    | 52.36(5)  |
| Te2 <sup>i</sup> –Ba1–Te1 <sup>vii</sup>   | 128.12(4) | Te5 <sup>xviii</sup> –Zr5–Zr6                  | 127.85(5) |
| Te2 <sup>viii</sup> –Ba2–Te7 <sup>ix</sup> | 65.79(4)  | Te5 <sup>xix</sup> –Zr5–Zr6                    | 127.85(5) |
| Te2 <sup>viii</sup> –Ba2–Te4 <sup>x</sup>  | 126.50(4) | Te5–Zr5–Zr6                                    | 127.85(5) |
| Te7 <sup>ix</sup> –Ba2–Te4 <sup>x</sup>    | 127.12(5) | Zr4–Zr5–Zr6                                    | 180.0     |

|                                                           |           |                                                             |           |
|-----------------------------------------------------------|-----------|-------------------------------------------------------------|-----------|
| Te <sup>2viii</sup> –Ba <sub>2</sub> –Te <sup>3x</sup>    | 128.35(4) | Te <sup>7</sup> –Zr <sub>6</sub> –Te <sup>7xviii</sup>      | 86.04(7)  |
| Te <sup>7ix</sup> –Ba <sub>2</sub> –Te <sup>3x</sup>      | 65.64(3)  | Te <sup>7</sup> –Zr <sub>6</sub> –Te <sup>7xix</sup>        | 86.04(7)  |
| Te <sup>4x</sup> –Ba <sub>2</sub> –Te <sup>3x</sup>       | 73.77(3)  | Te <sup>7xviii</sup> –Zr <sub>6</sub> –Te <sup>7xix</sup>   | 86.04(7)  |
| Te <sup>2viii</sup> –Ba <sub>2</sub> –Te <sup>6xi</sup>   | 82.40(3)  | Te <sup>7</sup> –Zr <sub>6</sub> –Te <sup>2xviii</sup>      | 81.60(4)  |
| Te <sup>7ix</sup> –Ba <sub>2</sub> –Te <sup>6xi</sup>     | 95.81(5)  | Te <sup>7xviii</sup> –Zr <sub>6</sub> –Te <sup>2xviii</sup> | 154.94(6) |
| Te <sup>4x</sup> –Ba <sub>2</sub> –Te <sup>6xi</sup>      | 134.07(4) | Te <sup>7xix</sup> –Zr <sub>6</sub> –Te <sup>2xviii</sup>   | 114.56(6) |
| Te <sup>3x</sup> –Ba <sub>2</sub> –Te <sup>6xi</sup>      | 118.92(4) | Te <sup>7</sup> –Zr <sub>6</sub> –Te <sup>2xix</sup>        | 114.56(6) |
| Te <sup>2viii</sup> –Ba <sub>2</sub> –Te <sup>1xii</sup>  | 66.56(3)  | Te <sup>7xviii</sup> –Zr <sub>6</sub> –Te <sup>2xix</sup>   | 81.60(4)  |
| Te <sup>7ix</sup> –Ba <sub>2</sub> –Te <sup>1xii</sup>    | 131.24(4) | Te <sup>7xix</sup> –Zr <sub>6</sub> –Te <sup>2xix</sup>     | 154.94(5) |
| Te <sup>4x</sup> –Ba <sub>2</sub> –Te <sup>1xii</sup>     | 90.02(3)  | Te <sup>2xviii</sup> –Zr <sub>6</sub> –Te <sup>2xix</sup>   | 83.86(7)  |
| Te <sup>3x</sup> –Ba <sub>2</sub> –Te <sup>1xii</sup>     | 162.60(4) | Te <sup>7</sup> –Zr <sub>6</sub> –Te <sub>2</sub>           | 154.94(5) |
| Te <sup>6xi</sup> –Ba <sub>2</sub> –Te <sup>1xii</sup>    | 68.14(3)  | Te <sup>7xviii</sup> –Zr <sub>6</sub> –Te <sub>2</sub>      | 114.56(6) |
| Te <sup>2viii</sup> –Ba <sub>2</sub> –Te <sup>4xiii</sup> | 78.19(3)  | Te <sup>7xix</sup> –Zr <sub>6</sub> –Te <sub>2</sub>        | 81.60(4)  |
| Te <sup>7ix</sup> –Ba <sub>2</sub> –Te <sup>4xiii</sup>   | 65.70(4)  | Te <sup>2xviii</sup> –Zr <sub>6</sub> –Te <sub>2</sub>      | 83.86(7)  |
| Te <sup>4x</sup> –Ba <sub>2</sub> –Te <sup>4xiii</sup>    | 68.01(4)  | Te <sup>2xix</sup> –Zr <sub>6</sub> –Te <sub>2</sub>        | 83.86(7)  |
| Te <sup>3x</sup> –Ba <sub>2</sub> –Te <sup>4xiii</sup>    | 66.81(3)  | Te <sup>7</sup> –Zr <sub>6</sub> –Zr <sub>8</sub>           | 51.98(5)  |
| Te <sup>6xi</sup> –Ba <sub>2</sub> –Te <sup>4xiii</sup>   | 157.40(4) | Te <sup>7xviii</sup> –Zr <sub>6</sub> –Zr <sub>8</sub>      | 51.98(5)  |
| Te <sup>1xii</sup> –Ba <sub>2</sub> –Te <sup>4xiii</sup>  | 113.41(4) | Te <sup>7xix</sup> –Zr <sub>6</sub> –Zr <sub>8</sub>        | 51.98(5)  |
| Te <sup>2viii</sup> –Ba <sub>2</sub> –Te <sup>6xii</sup>  | 133.53(4) | Te <sup>2xviii</sup> –Zr <sub>6</sub> –Zr <sub>8</sub>      | 129.50(4) |
| Te <sup>7ix</sup> –Ba <sub>2</sub> –Te <sup>6xii</sup>    | 150.40(5) | Te <sup>2xix</sup> –Zr <sub>6</sub> –Zr <sub>8</sub>        | 129.50(4) |
| Te <sup>4x</sup> –Ba <sub>2</sub> –Te <sup>6xii</sup>     | 64.55(3)  | Te <sub>2</sub> –Zr <sub>6</sub> –Zr <sub>8</sub>           | 129.50(4) |
| Te <sup>3x</sup> –Ba <sub>2</sub> –Te <sup>6xii</sup>     | 97.93(3)  | Te <sup>7</sup> –Zr <sub>6</sub> –Zr <sub>5</sub>           | 128.02(5) |
| Te <sup>6xi</sup> –Ba <sub>2</sub> –Te <sup>6xii</sup>    | 69.85(4)  | Te <sup>7xviii</sup> –Zr <sub>6</sub> –Zr <sub>5</sub>      | 128.02(5) |
| Te <sup>1xii</sup> –Ba <sub>2</sub> –Te <sup>6xii</sup>   | 68.71(3)  | Te <sup>7xix</sup> –Zr <sub>6</sub> –Zr <sub>5</sub>        | 128.02(5) |
| Te <sup>4xiii</sup> –Ba <sub>2</sub> –Te <sup>6xii</sup>  | 132.53(4) | Te <sup>2xviii</sup> –Zr <sub>6</sub> –Zr <sub>5</sub>      | 50.50(4)  |
| Te <sup>2viii</sup> –Ba <sub>2</sub> –Te <sup>3xii</sup>  | 128.81(4) | Te <sup>2xix</sup> –Zr <sub>6</sub> –Zr <sub>5</sub>        | 50.50(4)  |
| Te <sup>7ix</sup> –Ba <sub>2</sub> –Te <sup>3xii</sup>    | 82.23(4)  | Te <sub>2</sub> –Zr <sub>6</sub> –Zr <sub>5</sub>           | 50.50(4)  |
| Te <sup>4x</sup> –Ba <sub>2</sub> –Te <sup>3xii</sup>     | 104.59(3) | Zr <sub>8</sub> –Zr <sub>6</sub> –Zr <sub>5</sub>           | 180.0     |
| Te <sup>3x</sup> –Ba <sub>2</sub> –Te <sup>3xii</sup>     | 58.73(3)  | Te <sup>1xx</sup> –Zr <sub>7</sub> –Te <sup>1xxi</sup>      | 92.11(3)  |
| Te <sup>6xi</sup> –Ba <sub>2</sub> –Te <sup>3xii</sup>    | 61.42(3)  | Te <sup>1xx</sup> –Zr <sub>7</sub> –Te <sup>1xxii</sup>     | 92.11(3)  |
| Te <sup>1xii</sup> –Ba <sub>2</sub> –Te <sup>3xii</sup>   | 121.77(4) | Te <sup>1xxi</sup> –Zr <sub>7</sub> –Te <sup>1xxii</sup>    | 92.11(3)  |
| Te <sup>4xiii</sup> –Ba <sub>2</sub> –Te <sup>3xii</sup>  | 124.44(3) | Te <sup>1xx</sup> –Zr <sub>7</sub> –Te <sub>1</sub>         | 180.00(3) |
| Te <sup>6xii</sup> –Ba <sub>2</sub> –Te <sup>3xii</sup>   | 68.18(3)  | Te <sup>1xxi</sup> –Zr <sub>7</sub> –Te <sub>1</sub>        | 87.89(3)  |
| Te <sup>7xiv</sup> –Ba <sub>3</sub> –Te <sup>7xv</sup>    | 75.98(6)  | Te <sup>1xxii</sup> –Zr <sub>7</sub> –Te <sub>1</sub>       | 87.89(3)  |
| Te <sup>7xiv</sup> –Ba <sub>3</sub> –Te <sub>6</sub>      | 81.11(4)  | Te <sup>1xx</sup> –Zr <sub>7</sub> –Te <sup>1xviii</sup>    | 87.90(3)  |

|                                                                                    |           |                                                                      |            |
|------------------------------------------------------------------------------------|-----------|----------------------------------------------------------------------|------------|
| Te <sup>7xv</sup> -Ba <sub>3</sub> -Te <sub>6</sub>                                | 111.20(5) | Te <sup>1xxi</sup> -Zr <sub>7</sub> -Te <sup>1xviii</sup>            | 180.0      |
| Te <sup>7xiv</sup> -Ba <sub>3</sub> -Te <sub>6</sub> <sup>xvi</sup>                | 111.20(5) | Te <sup>1xxii</sup> -Zr <sub>7</sub> -Te <sup>1xviii</sup>           | 87.90(3)   |
| Te <sup>7xv</sup> -Ba <sub>3</sub> -Te <sub>6</sub> <sup>xvi</sup>                 | 81.10(4)  | Te <sup>1</sup> -Zr <sub>7</sub> -Te <sup>1xviii</sup>               | 92.10(3)   |
| Te <sub>6</sub> -Ba <sub>3</sub> -Te <sub>6</sub> <sup>xvi</sup>                   | 164.91(7) | Te <sup>1xx</sup> -Zr <sub>7</sub> -Te <sup>1xix</sup>               | 87.90(3)   |
| Te <sup>7xiv</sup> -Ba <sub>3</sub> -Te <sub>3</sub> <sup>xvi</sup>                | 119.26(3) | Te <sup>1xxi</sup> -Zr <sub>7</sub> -Te <sup>1xix</sup>              | 87.90(3)   |
| Te <sup>7xv</sup> -Ba <sub>3</sub> -Te <sub>3</sub> <sup>xvi</sup>                 | 151.28(4) | Te <sup>1xxii</sup> -Zr <sub>7</sub> -Te <sup>1xix</sup>             | 180.0      |
| Te <sub>6</sub> -Ba <sub>3</sub> -Te <sub>3</sub> <sup>xvi</sup>                   | 95.83(4)  | Te <sup>1</sup> -Zr <sub>7</sub> -Te <sup>1xix</sup>                 | 92.10(3)   |
| Te <sub>6</sub> <sup>xvi</sup> -Ba <sub>3</sub> -Te <sub>3</sub> <sup>xvi</sup>    | 70.78(3)  | Te <sup>1xviii</sup> -Zr <sub>7</sub> -Te <sup>1xix</sup>            | 92.10(3)   |
| Te <sup>7xiv</sup> -Ba <sub>3</sub> -Te <sub>3</sub>                               | 151.28(4) | Te <sup>1xx</sup> -Zr <sub>7</sub> -Zr <sub>1</sub>                  | 123.76(2)  |
| Te <sup>7xv</sup> -Ba <sub>3</sub> -Te <sub>3</sub>                                | 119.26(3) | Te <sup>1xxi</sup> -Zr <sub>7</sub> -Zr <sub>1</sub>                 | 123.76(2)  |
| Te <sub>6</sub> -Ba <sub>3</sub> -Te <sub>3</sub>                                  | 70.78(3)  | Te <sup>1xxii</sup> -Zr <sub>7</sub> -Zr <sub>1</sub>                | 123.76(2)  |
| Te <sub>6</sub> <sup>xvi</sup> -Ba <sub>3</sub> -Te <sub>3</sub>                   | 95.83(4)  | Te <sup>1</sup> -Zr <sub>7</sub> -Zr <sub>1</sub>                    | 56.24(2)   |
| Te <sub>3</sub> <sup>xvi</sup> -Ba <sub>3</sub> -Te <sub>3</sub>                   | 59.89(4)  | Te <sup>1xviii</sup> -Zr <sub>7</sub> -Zr <sub>1</sub>               | 56.23(2)   |
| Te <sup>7xiv</sup> -Ba <sub>3</sub> -Te <sub>3</sub> <sup>xvii</sup>               | 63.80(4)  | Te <sup>1xix</sup> -Zr <sub>7</sub> -Zr <sub>1</sub>                 | 56.23(2)   |
| Te <sup>7xv</sup> -Ba <sub>3</sub> -Te <sub>3</sub> <sup>xvii</sup>                | 106.32(5) | Te <sup>1xx</sup> -Zr <sub>7</sub> -Zr <sub>1</sub> <sup>xx</sup>    | 56.24(2)   |
| Te <sub>6</sub> -Ba <sub>3</sub> -Te <sub>3</sub> <sup>xvii</sup>                  | 119.26(2) | Te <sup>1xxi</sup> -Zr <sub>7</sub> -Zr <sub>1</sub> <sup>xx</sup>   | 56.24(2)   |
| Te <sub>6</sub> <sup>xvi</sup> -Ba <sub>3</sub> -Te <sub>3</sub> <sup>xvii</sup>   | 62.48(2)  | Te <sup>1xxii</sup> -Zr <sub>7</sub> -Zr <sub>1</sub> <sup>xx</sup>  | 56.24(2)   |
| Te <sub>3</sub> <sup>xvi</sup> -Ba <sub>3</sub> -Te <sub>3</sub> <sup>xvii</sup>   | 65.94(3)  | Te <sup>1</sup> -Zr <sub>7</sub> -Zr <sub>1</sub> <sup>xx</sup>      | 123.76(2)  |
| Te <sub>3</sub> -Ba <sub>3</sub> -Te <sub>3</sub> <sup>xvii</sup>                  | 125.74(4) | Te <sup>1xviii</sup> -Zr <sub>7</sub> -Zr <sub>1</sub> <sup>xx</sup> | 123.77(2)  |
| Te <sup>7xiv</sup> -Ba <sub>3</sub> -Te <sub>3</sub> <sup>xviii</sup>              | 106.32(5) | Te <sup>1xix</sup> -Zr <sub>7</sub> -Zr <sub>1</sub> <sup>xx</sup>   | 123.77(2)  |
| Te <sup>7xv</sup> -Ba <sub>3</sub> -Te <sub>3</sub> <sup>xviii</sup>               | 63.80(4)  | Zr <sub>1</sub> -Zr <sub>7</sub> -Zr <sub>1</sub> <sup>xx</sup>      | 180.0      |
| Te <sub>6</sub> -Ba <sub>3</sub> -Te <sub>3</sub> <sup>xviii</sup>                 | 62.48(2)  | Te <sup>7xxiii</sup> -Zr <sub>8</sub> -Te <sup>7xxiv</sup>           | 85.23(4)   |
| Te <sub>6</sub> <sup>xvi</sup> -Ba <sub>3</sub> -Te <sub>3</sub> <sup>xviii</sup>  | 119.26(2) | Te <sup>7xxiii</sup> -Zr <sub>8</sub> -Te <sup>7xxv</sup>            | 85.23(4)   |
| Te <sub>3</sub> <sup>xvi</sup> -Ba <sub>3</sub> -Te <sub>3</sub> <sup>xviii</sup>  | 125.74(4) | Te <sup>7xxiv</sup> -Zr <sub>8</sub> -Te <sup>7xxv</sup>             | 85.23(4)   |
| Te <sub>3</sub> -Ba <sub>3</sub> -Te <sub>3</sub> <sup>xviii</sup>                 | 65.94(3)  | Te <sup>7xxiii</sup> -Zr <sub>8</sub> -Te <sup>7xviii</sup>          | 177.70(11) |
| Te <sub>3</sub> <sup>xvii</sup> -Ba <sub>3</sub> -Te <sub>3</sub> <sup>xviii</sup> | 168.31(6) | Te <sup>7xxiv</sup> -Zr <sub>8</sub> -Te <sup>7xviii</sup>           | 93.24(9)   |
| Te <sup>1xviii</sup> -Zr <sub>1</sub> -Te <sup>1xix</sup>                          | 92.62(7)  | Te <sup>7xxv</sup> -Zr <sub>8</sub> -Te <sup>7xviii</sup>            | 96.36(7)   |
| Te <sup>1xviii</sup> -Zr <sub>1</sub> -Te <sup>1</sup>                             | 92.62(7)  | Te <sup>7xxiii</sup> -Zr <sub>8</sub> -Te <sup>7xix</sup>            | 96.36(7)   |
| Te <sup>1xix</sup> -Zr <sub>1</sub> -Te <sup>1</sup>                               | 92.62(7)  | Te <sup>7xxiv</sup> -Zr <sub>8</sub> -Te <sup>7xix</sup>             | 177.70(10) |
| Te <sup>1xviii</sup> -Zr <sub>1</sub> -Te <sub>6</sub> <sup>xix</sup>              | 177.61(8) | Te <sup>7xxv</sup> -Zr <sub>8</sub> -Te <sup>7xix</sup>              | 93.24(9)   |
| Te <sup>1xix</sup> -Zr <sub>1</sub> -Te <sub>6</sub> <sup>xix</sup>                | 89.75(3)  | Te <sup>7xviii</sup> -Zr <sub>8</sub> -Te <sup>7xix</sup>            | 85.22(4)   |
| Te <sup>1</sup> -Zr <sub>1</sub> -Te <sub>6</sub> <sup>xix</sup>                   | 87.58(3)  | Te <sup>7xxiii</sup> -Zr <sub>8</sub> -Te <sup>7</sup>               | 93.24(9)   |
| Te <sup>1xviii</sup> -Zr <sub>1</sub> -Te <sub>6</sub> <sup>xviii</sup>            | 89.75(3)  | Te <sup>7xxiv</sup> -Zr <sub>8</sub> -Te <sup>7</sup>                | 96.36(7)   |
| Te <sup>1xix</sup> -Zr <sub>1</sub> -Te <sub>6</sub> <sup>xviii</sup>              | 87.58(3)  | Te <sup>7xxv</sup> -Zr <sub>8</sub> -Te <sup>7</sup>                 | 177.70(10) |
| Te <sup>1</sup> -Zr <sub>1</sub> -Te <sub>6</sub> <sup>xviii</sup>                 | 177.61(8) | Te <sup>7xviii</sup> -Zr <sub>8</sub> -Te <sup>7</sup>               | 85.22(4)   |



|                                                |           |                                                 |           |
|------------------------------------------------|-----------|-------------------------------------------------|-----------|
| Te6 <sup>xix</sup> -Zr1-Te6 <sup>xviii</sup>   | 90.04(6)  | Te7 <sup>xix</sup> -Zr8-Te7                     | 85.22(4)  |
| Te1 <sup>xviii</sup> -Zr1-Te6                  | 87.58(3)  | Te7 <sup>xxiii</sup> -Zr8-Zr6                   | 128.57(3) |
| Te1 <sup>xix</sup> -Zr1-Te6                    | 177.60(8) | Te7 <sup>xxiv</sup> -Zr8-Zr6                    | 128.57(3) |
| Te1-Zr1-Te6                                    | 89.76(3)  | Te7 <sup>xxv</sup> -Zr8-Zr6                     | 128.57(3) |
| Te6 <sup>xix</sup> -Zr1-Te6                    | 90.04(6)  | Te7 <sup>xviii</sup> -Zr8-Zr6                   | 51.42(3)  |
| Te6 <sup>xviii</sup> -Zr1-Te6                  | 90.04(7)  | Te7 <sup>xix</sup> -Zr8-Zr6                     | 51.42(3)  |
| Te1 <sup>xviii</sup> -Zr1-Zr7                  | 56.61(5)  | Te7-Zr8-Zr6                                     | 51.42(3)  |
| Te1 <sup>xix</sup> -Zr1-Zr7                    | 56.61(5)  | Te7 <sup>xxiii</sup> -Zr8-Zr6 <sup>xxiv</sup>   | 51.42(3)  |
| Te1-Zr1-Zr7                                    | 56.61(5)  | Te7 <sup>xxiv</sup> -Zr8-Zr6 <sup>xxiv</sup>    | 51.43(3)  |
| Te6 <sup>xix</sup> -Zr1-Zr7                    | 125.24(5) | Te7 <sup>xxv</sup> -Zr8-Zr6 <sup>xxiv</sup>     | 51.43(3)  |
| Te6 <sup>xviii</sup> -Zr1-Zr7                  | 125.24(5) | Te7 <sup>xviii</sup> -Zr8-Zr6 <sup>xxiv</sup>   | 128.58(3) |
| Te6-Zr1-Zr7                                    | 125.24(5) | Te7 <sup>xix</sup> -Zr8-Zr6 <sup>xxiv</sup>     | 128.58(3) |
| Te1 <sup>xviii</sup> -Zr1-Zr2                  | 123.39(5) | Te7-Zr8-Zr6 <sup>xxiv</sup>                     | 128.58(3) |
| Te1 <sup>xix</sup> -Zr1-Zr2                    | 123.39(5) | Zr6-Zr8-Zr6 <sup>xxiv</sup>                     | 180.0     |
| Te1-Zr1-Zr2                                    | 123.39(5) | Zr1-Te1-Zr7                                     | 67.15(5)  |
| Te6 <sup>xix</sup> -Zr1-Zr2                    | 54.76(5)  | Zr1-Te1-Ba2 <sup>xxvi</sup>                     | 86.10(5)  |
| Te6 <sup>xviii</sup> -Zr1-Zr2                  | 54.76(5)  | Zr7-Te1-Ba2 <sup>xxvi</sup>                     | 153.24(4) |
| Te6-Zr1-Zr2                                    | 54.76(5)  | Zr1-Te1-Ba1 <sup>xxvii</sup>                    | 86.53(4)  |
| Zr7-Zr1-Zr2                                    | 180.0     | Zr7-Te1-Ba1 <sup>xxvii</sup>                    | 89.58(3)  |
| Te3-Zr2-Te3 <sup>xviii</sup>                   | 89.22(6)  | Ba2 <sup>xxvi</sup> -Te1-Ba1 <sup>xxvii</sup>   | 87.83(4)  |
| Te3-Zr2-Te3 <sup>xix</sup>                     | 89.22(6)  | Zr1-Te1-Ba1 <sup>xxviii</sup>                   | 83.55(3)  |
| Te3 <sup>xviii</sup> -Zr2-Te3 <sup>xix</sup>   | 89.22(6)  | Zr7-Te1-Ba1 <sup>xxviii</sup>                   | 86.49(4)  |
| Te3-Zr2-Te6                                    | 95.35(3)  | Ba2 <sup>xxvi</sup> -Te1-Ba1 <sup>xxviii</sup>  | 91.57(4)  |
| Te3 <sup>xviii</sup> -Zr2-Te6                  | 83.68(3)  | Ba1 <sup>xxvii</sup> -Te1-Ba1 <sup>xxviii</sup> | 170.07(4) |
| Te3 <sup>xix</sup> -Zr2-Te6                    | 171.49(4) | Zr1-Te1-Ba1 <sup>xxix</sup>                     | 152.09(6) |
| Te3-Zr2-Te6 <sup>xix</sup>                     | 83.68(3)  | Zr7-Te1-Ba1 <sup>xxix</sup>                     | 85.01(3)  |
| Te3 <sup>xviii</sup> -Zr2-Te6 <sup>xix</sup>   | 171.49(4) | Ba2 <sup>xxvi</sup> -Te1-Ba1 <sup>xxix</sup>    | 121.75(4) |
| Te3 <sup>xix</sup> -Zr2-Te6 <sup>xix</sup>     | 95.35(3)  | Ba1 <sup>xxvii</sup> -Te1-Ba1 <sup>xxix</sup>   | 95.65(3)  |
| Te6-Zr2-Te6 <sup>xix</sup>                     | 92.29(6)  | Ba1 <sup>xxviii</sup> -Te1-Ba1 <sup>xxix</sup>  | 93.09(3)  |
| Te3-Zr2-Te6 <sup>xviii</sup>                   | 171.49(4) | Zr5-Te2-Zr6                                     | 77.14(6)  |
| Te3 <sup>xviii</sup> -Zr2-Te6 <sup>xviii</sup> | 95.35(3)  | Zr5-Te2-Ba2 <sup>xxx</sup>                      | 178.77(6) |
| Te3 <sup>xix</sup> -Zr2-Te6 <sup>xviii</sup>   | 83.69(3)  | Zr6-Te2-Ba2 <sup>xxx</sup>                      | 101.86(5) |
| Te6-Zr2-Te6 <sup>xviii</sup>                   | 92.29(6)  | Zr5-Te2-Ba1 <sup>xxxi</sup>                     | 82.84(4)  |
| Te6 <sup>xix</sup> -Zr2-Te6 <sup>xviii</sup>   | 92.29(6)  | Zr6-Te2-Ba1 <sup>xxxi</sup>                     | 98.60(4)  |
| Te3-Zr2-Zr1                                    | 125.81(5) | Ba2 <sup>xxx</sup> -Te2-Ba1 <sup>xxxi</sup>     | 96.64(4)  |

|                                                             |           |                                                              |           |
|-------------------------------------------------------------|-----------|--------------------------------------------------------------|-----------|
| Te <sup>3xviii</sup> –Zr <sub>2</sub> –Zr <sub>1</sub>      | 125.82(5) | Zr <sub>5</sub> –Te <sub>2</sub> –Ba <sup>1xxxii</sup>       | 78.70(3)  |
| Te <sup>3xix</sup> –Zr <sub>2</sub> –Zr <sub>1</sub>        | 125.82(5) | Zr <sub>6</sub> –Te <sub>2</sub> –Ba <sup>1xxxii</sup>       | 93.65(4)  |
| Te <sub>6</sub> –Zr <sub>2</sub> –Zr <sub>1</sub>           | 56.37(5)  | Ba <sup>2xxx</sup> –Te <sub>2</sub> –Ba <sup>1xxxii</sup>    | 102.11(4) |
| Te <sup>6xix</sup> –Zr <sub>2</sub> –Zr <sub>1</sub>        | 56.37(5)  | Ba <sup>1xxxii</sup> –Te <sub>2</sub> –Ba <sup>1xxxii</sup>  | 154.97(5) |
| Te <sup>6xviii</sup> –Zr <sub>2</sub> –Zr <sub>1</sub>      | 56.37(5)  | Zr <sub>3</sub> –Te <sub>3</sub> –Zr <sub>2</sub>            | 71.35(6)  |
| Te <sub>3</sub> –Zr <sub>2</sub> –Zr <sub>3</sub>           | 54.19(5)  | Zr <sub>3</sub> –Te <sub>3</sub> –Ba <sup>2x</sup>           | 84.32(5)  |
| Te <sup>3xviii</sup> –Zr <sub>2</sub> –Zr <sub>3</sub>      | 54.18(5)  | Zr <sub>2</sub> –Te <sub>3</sub> –Ba <sup>2x</sup>           | 153.70(5) |
| Te <sup>3xix</sup> –Zr <sub>2</sub> –Zr <sub>3</sub>        | 54.18(5)  | Zr <sub>3</sub> –Te <sub>3</sub> –Ba <sub>3</sub>            | 89.80(3)  |
| Te <sub>6</sub> –Zr <sub>2</sub> –Zr <sub>3</sub>           | 123.63(5) | Zr <sub>2</sub> –Te <sub>3</sub> –Ba <sub>3</sub>            | 86.34(3)  |
| Te <sup>6xix</sup> –Zr <sub>2</sub> –Zr <sub>3</sub>        | 123.63(5) | Ba <sup>2x</sup> –Te <sub>3</sub> –Ba <sub>3</sub>           | 83.68(3)  |
| Te <sup>6xviii</sup> –Zr <sub>2</sub> –Zr <sub>3</sub>      | 123.63(5) | Zr <sub>3</sub> –Te <sub>3</sub> –Ba <sup>3xix</sup>         | 88.72(4)  |
| Zr <sub>1</sub> –Zr <sub>2</sub> –Zr <sub>3</sub>           | 180.0     | Zr <sub>2</sub> –Te <sub>3</sub> –Ba <sup>3xix</sup>         | 85.31(3)  |
| Te <sup>3xviii</sup> –Zr <sub>3</sub> –Te <sup>3xix</sup>   | 89.62(7)  | Ba <sup>2x</sup> –Te <sub>3</sub> –Ba <sup>3xix</sup>        | 104.44(3) |
| Te <sup>3xviii</sup> –Zr <sub>3</sub> –Te <sub>3</sub>      | 89.62(7)  | Ba <sub>3</sub> –Te <sub>3</sub> –Ba <sup>3xix</sup>         | 171.55(3) |
| Te <sup>3xix</sup> –Zr <sub>3</sub> –Te <sub>3</sub>        | 89.62(7)  | Zr <sub>3</sub> –Te <sub>3</sub> –Ba <sup>2xxvi</sup>        | 151.50(5) |
| Te <sup>3xviii</sup> –Zr <sub>3</sub> –Te <sub>4</sub>      | 87.21(3)  | Zr <sub>2</sub> –Te <sub>3</sub> –Ba <sup>2xxvi</sup>        | 81.79(5)  |
| Te <sup>3xix</sup> –Zr <sub>3</sub> –Te <sub>4</sub>        | 174.05(4) | Ba <sup>2x</sup> –Te <sub>3</sub> –Ba <sup>2xxvi</sup>       | 119.75(3) |
| Te <sub>3</sub> –Zr <sub>3</sub> –Te <sub>4</sub>           | 95.39(3)  | Ba <sub>3</sub> –Te <sub>3</sub> –Ba <sup>2xxvi</sup>        | 78.93(3)  |
| Te <sup>3xviii</sup> –Zr <sub>3</sub> –Te <sup>4xix</sup>   | 174.05(4) | Ba <sup>3xix</sup> –Te <sub>3</sub> –Ba <sup>2xxvi</sup>     | 98.60(3)  |
| Te <sup>3xix</sup> –Zr <sub>3</sub> –Te <sup>4xix</sup>     | 95.39(3)  | Zr <sub>3</sub> –Te <sub>4</sub> –Zr <sub>4</sub>            | 74.07(6)  |
| Te <sub>3</sub> –Zr <sub>3</sub> –Te <sup>4xix</sup>        | 87.21(3)  | Zr <sub>3</sub> –Te <sub>4</sub> –Ba <sup>2x</sup>           | 84.39(3)  |
| Te <sub>4</sub> –Zr <sub>3</sub> –Te <sup>4xix</sup>        | 88.08(7)  | Zr <sub>4</sub> –Te <sub>4</sub> –Ba <sup>2x</sup>           | 91.22(3)  |
| Te <sup>3xviii</sup> –Zr <sub>3</sub> –Te <sup>4xviii</sup> | 95.39(3)  | Zr <sub>3</sub> –Te <sub>4</sub> –Ba <sup>1xxxiii</sup>      | 167.45(6) |
| Te <sup>3xix</sup> –Zr <sub>3</sub> –Te <sup>4xviii</sup>   | 87.21(3)  | Zr <sub>4</sub> –Te <sub>4</sub> –Ba <sup>1xxxiii</sup>      | 95.06(5)  |
| Te <sub>3</sub> –Zr <sub>3</sub> –Te <sup>4xviii</sup>      | 174.05(4) | Ba <sup>2x</sup> –Te <sub>4</sub> –Ba <sup>1xxxiii</sup>     | 89.71(3)  |
| Te <sub>4</sub> –Zr <sub>3</sub> –Te <sup>4xviii</sup>      | 88.08(7)  | Zr <sub>3</sub> –Te <sub>4</sub> –Ba <sup>2xxxiv</sup>       | 82.27(3)  |
| Te <sup>4xix</sup> –Zr <sub>3</sub> –Te <sup>4xviii</sup>   | 88.08(7)  | Zr <sub>4</sub> –Te <sub>4</sub> –Ba <sup>2xxxiv</sup>       | 88.93(3)  |
| Te <sup>3xviii</sup> –Zr <sub>3</sub> –Zr <sub>2</sub>      | 54.47(5)  | Ba <sup>2x</sup> –Te <sub>4</sub> –Ba <sup>2xxxiv</sup>      | 166.08(4) |
| Te <sup>3xix</sup> –Zr <sub>3</sub> –Zr <sub>2</sub>        | 54.47(5)  | Ba <sup>1xxxiii</sup> –Te <sub>4</sub> –Ba <sup>2xxxiv</sup> | 104.15(4) |
| Te <sub>3</sub> –Zr <sub>3</sub> –Zr <sub>2</sub>           | 54.46(5)  | Zr <sub>4</sub> –Te <sub>5</sub> –Zr <sub>5</sub>            | 74.00(7)  |
| Te <sub>4</sub> –Zr <sub>3</sub> –Zr <sub>2</sub>           | 126.61(5) | Zr <sub>4</sub> –Te <sub>5</sub> –Ba <sup>1xxxii</sup>       | 149.76(6) |
| Te <sup>4xix</sup> –Zr <sub>3</sub> –Zr <sub>2</sub>        | 126.61(5) | Zr <sub>5</sub> –Te <sub>5</sub> –Ba <sup>1xxxii</sup>       | 85.06(5)  |
| Te <sup>4xviii</sup> –Zr <sub>3</sub> –Zr <sub>2</sub>      | 126.61(5) | Zr <sub>4</sub> –Te <sub>5</sub> –Ba <sup>1xvii</sup>        | 95.28(4)  |
| Te <sup>3xviii</sup> –Zr <sub>3</sub> –Zr <sub>4</sub>      | 125.53(5) | Zr <sub>5</sub> –Te <sub>5</sub> –Ba <sup>1xvii</sup>        | 111.47(5) |
| Te <sup>3xix</sup> –Zr <sub>3</sub> –Zr <sub>4</sub>        | 125.53(5) | Ba <sup>1xxxii</sup> –Te <sub>5</sub> –Ba <sup>1xvii</sup>   | 112.83(4) |

|                                                |           |                                               |           |
|------------------------------------------------|-----------|-----------------------------------------------|-----------|
| Te3–Zr3–Zr4                                    | 125.54(5) | Zr2–Te6–Zr1                                   | 68.87(6)  |
| Te4–Zr3–Zr4                                    | 53.39(5)  | Zr2–Te6–Ba2 <sup>xxxv</sup>                   | 88.01(3)  |
| Te4 <sup>xix</sup> –Zr3–Zr4                    | 53.39(5)  | Zr1–Te6–Ba2 <sup>xxxv</sup>                   | 85.39(3)  |
| Te4 <sup>xviii</sup> –Zr3–Zr4                  | 53.39(5)  | Zr2–Te6–Ba1 <sup>xxvii</sup>                  | 154.11(6) |
| Zr2–Zr3–Zr4                                    | 180.0     | Zr1–Te6–Ba1 <sup>xxvii</sup>                  | 85.61(5)  |
| Te5–Zr4–Te5 <sup>xviii</sup>                   | 88.74(7)  | Ba2 <sup>xxxv</sup> –Te6–Ba1 <sup>xxvii</sup> | 94.40(3)  |
| Te5–Zr4–Te5 <sup>xix</sup>                     | 88.74(7)  | Zr2–Te6–Ba3                                   | 86.77(5)  |
| Te5 <sup>xviii</sup> –Zr4–Te5 <sup>xix</sup>   | 88.74(7)  | Zr1–Te6–Ba3                                   | 152.72(6) |
| Te5–Zr4–Te4 <sup>xix</sup>                     | 82.74(3)  | Ba2 <sup>xxxv</sup> –Te6–Ba3                  | 106.54(4) |
| Te5 <sup>xviii</sup> –Zr4–Te4 <sup>xix</sup>   | 164.61(4) | Ba1 <sup>xxvii</sup> –Te6–Ba3                 | 116.94(4) |
| Te5 <sup>xix</sup> –Zr4–Te4 <sup>xix</sup>     | 103.80(4) | Zr2–Te6–Ba2 <sup>xxvi</sup>                   | 86.34(3)  |
| Te5–Zr4–Te4 <sup>xviii</sup>                   | 164.61(4) | Zr1–Te6–Ba2 <sup>xxvi</sup>                   | 83.81(3)  |
| Te5 <sup>xviii</sup> –Zr4–Te4 <sup>xviii</sup> | 103.80(4) | Ba2 <sup>xxxv</sup> –Te6–Ba2 <sup>xxvi</sup>  | 169.03(4) |
| Te5 <sup>xix</sup> –Zr4–Te4 <sup>xviii</sup>   | 82.74(3)  | Ba1 <sup>xxvii</sup> –Te6–Ba2 <sup>xxvi</sup> | 86.66(3)  |
| Te4 <sup>xix</sup> –Zr4–Te4 <sup>xviii</sup>   | 86.86(7)  | Ba3–Te6–Ba2 <sup>xxvi</sup>                   | 82.53(4)  |
| Te5–Zr4–Te4                                    | 103.80(4) | Zr6–Te7–Zr8                                   | 76.60(5)  |
| Te5 <sup>xviii</sup> –Zr4–Te4                  | 82.74(3)  | Zr6–Te7–Ba3 <sup>xv</sup>                     | 135.09(8) |
| Te5 <sup>xix</sup> –Zr4–Te4                    | 164.61(4) | Zr8–Te7–Ba3 <sup>xv</sup>                     | 93.82(4)  |
| Te4 <sup>xix</sup> –Zr4–Te4                    | 86.86(7)  | Zr6–Te7–Ba2 <sup>xxxvi</sup>                  | 102.93(5) |
| Te4 <sup>xviii</sup> –Zr4–Te4                  | 86.86(7)  | Zr8–Te7–Ba2 <sup>xxxvi</sup>                  | 137.49(9) |
| Te5–Zr4–Zr5                                    | 53.85(5)  | Ba3 <sup>xv</sup> –Te7–Ba2 <sup>xxxvi</sup>   | 112.51(4) |
| Te5 <sup>xviii</sup> –Zr4–Zr5                  | 53.85(5)  |                                               |           |

Symmetry codes: (i)  $-x+y+2/3, y+1/3, z-1/6$ ; (ii)  $y-1/3, x-2/3, -z+5/6$ ; (iii)  $x-1, y, z$ ; (iv)  $x-1/3, x-y+1/3, z-1/6$ ; (v)  $x-y-1/3, -y+1/3, -z+5/6$ ; (vi)  $-y, x-y, z$ ; (vii)  $x-y-2/3, x-1/3, -z+2/3$ ; (viii)  $x, y+1, z$ ; (ix)  $-x+y+1, -x+2, z$ ; (x)  $-x+1, -y+1, -z+1$ ; (xi)  $x-2/3, x-y+2/3, z+1/6$ ; (xii)  $-y+1/3, -x+5/3, z+1/6$ ; (xiii)  $x-y, x, -z+1$ ; (xiv)  $-y+5/3, -x+4/3, z-1/6$ ; (xv)  $-x+2, -y+1, -z+1$ ; (xvi)  $y+2/3, x-2/3, -z+5/6$ ; (xvii)  $x-y+2/3, -y+1/3, -z+5/6$ ; (xviii)  $-y+1, x-y, z$ ; (xix)  $-x+y+1, -x+1, z$ ; (xx)  $-x+4/3, -y+2/3, -z+2/3$ ; (xxi)  $y+1/3, -x+y+2/3, -z+2/3$ ; (xxii)  $x-y+1/3, x-1/3, -z+2/3$ ; (xxiii)  $x-y+1/3, -y+2/3, -z+7/6$ ; (xxiv)  $y+1/3, x-1/3, -z+7/6$ ; (xxv)  $-x+4/3, -x+y+2/3, -z+7/6$ ; (xxvi)  $-y+5/3, -x+1/3, z-1/6$ ; (xxvii)  $x+1, y, z$ ; (xxviii)  $-x+y, -x, z$ ; (xxix)  $y+1/3, -x+y-1/3, -z+2/3$ ; (xxx)  $x, y-1, z$ ; (xxxii)  $x+1/3, x-y+2/3, z+1/6$ ; (xxxiii)  $-x+y+1/3, y-1/3, z+1/6$ ; (xxxiiii)  $y+2/3, x+1/3, -z+5/6$ ; (xxxv)  $y, -x+y, -z+1$ ; (xxxvi)  $x+2/3, x-y+4/3, z-1/6$ ; (xxxvii)  $-y+2, x-y+1, z$ .
